# Supplementary material for: Nanomaterial modified electrodes: evaluating oxygen reduction catalysts
Source: Royal Society of Chemistry journal article supplement (doi:10.1039/c3nr01940c), 2013-01-01
Supplement: c3nr01940c.pdf [file c3nr01940c.pdf]

## Supplementary Data

Table S1: Percentage difference in current density with respect to the total electroactive surface area ( $j$ ) compared to surface coverage for arrays of hemispherical particles.

| Coverage |                           | 900mV       |                           | 850mV       |                           | 800mV        |                           | 750mV        |                           | 700mV        |  |
|----------|---------------------------|-------------|---------------------------|-------------|---------------------------|--------------|---------------------------|--------------|---------------------------|--------------|--|
| %        | $j$ ( $\text{A m}^{-2}$ ) | % dif.      | $j$ ( $\text{A m}^{-2}$ ) | % dif.      | $j$ ( $\text{A m}^{-2}$ ) | % dif.       | $j$ ( $\text{A m}^{-2}$ ) | % dif.       | $j$ ( $\text{A m}^{-2}$ ) | % dif.       |  |
| 10.0     | -0.29976                  | <b>0.00</b> | -0.78542                  | <b>0.00</b> | -2.02358                  | <b>0.00</b>  | -4.99333                  | <b>0.00</b>  | -11.08391                 | <b>0.00</b>  |  |
| 12.5     | -0.29930                  | <b>0.15</b> | -0.78216                  | <b>0.41</b> | -2.00183                  | <b>1.08</b>  | -4.85727                  | <b>2.72</b>  | -10.36664                 | <b>6.47</b>  |  |
| 15.0     | -0.29881                  | <b>0.32</b> | -0.77893                  | <b>0.83</b> | -1.98045                  | <b>2.13</b>  | -4.72651                  | <b>5.34</b>  | -9.71561                  | <b>12.34</b> |  |
| 17.5     | -0.29836                  | <b>0.47</b> | -0.77574                  | <b>1.23</b> | -1.95937                  | <b>3.17</b>  | -4.60078                  | <b>7.86</b>  | -9.12339                  | <b>17.69</b> |  |
| 20.0     | -0.29788                  | <b>0.63</b> | -0.77258                  | <b>1.63</b> | -1.93862                  | <b>4.20</b>  | -4.47984                  | <b>10.28</b> | -8.58326                  | <b>22.56</b> |  |
| 22.5     | -0.29743                  | <b>0.78</b> | -0.76939                  | <b>2.04</b> | -1.91820                  | <b>5.21</b>  | -4.36347                  | <b>12.61</b> | -8.08968                  | <b>27.01</b> |  |
| 25.0     | -0.29697                  | <b>0.93</b> | -0.76626                  | <b>2.44</b> | -1.89804                  | <b>6.20</b>  | -4.25144                  | <b>14.86</b> | -7.63752                  | <b>31.09</b> |  |
| 27.5     | -0.29648                  | <b>1.09</b> | -0.76310                  | <b>2.84</b> | -1.87821                  | <b>7.18</b>  | -4.14357                  | <b>17.02</b> | -7.22267                  | <b>34.84</b> |  |
| 30.0     | -0.29604                  | <b>1.24</b> | -0.76001                  | <b>3.24</b> | -1.85869                  | <b>8.15</b>  | -4.03960                  | <b>19.10</b> | -6.84119                  | <b>38.28</b> |  |
| 32.5     | -0.29555                  | <b>1.41</b> | -0.75692                  | <b>3.63</b> | -1.83947                  | <b>9.10</b>  | -3.93949                  | <b>21.10</b> | -6.48967                  | <b>41.45</b> |  |
| 35.0     | -0.29515                  | <b>1.54</b> | -0.75388                  | <b>4.02</b> | -1.82052                  | <b>10.03</b> | -3.84295                  | <b>23.04</b> | -6.16515                  | <b>44.38</b> |  |
| 37.5     | -0.29466                  | <b>1.70</b> | -0.75078                  | <b>4.41</b> | -1.80183                  | <b>10.96</b> | -3.74981                  | <b>24.90</b> | -5.86510                  | <b>47.08</b> |  |
| 40.0     | -0.29421                  | <b>1.85</b> | -0.74777                  | <b>4.79</b> | -1.78340                  | <b>11.87</b> | -3.66005                  | <b>26.70</b> | -5.58718                  | <b>49.59</b> |  |
| 42.2     | -0.29373                  | <b>2.01</b> | -0.74473                  | <b>5.18</b> | -1.76529                  | <b>12.76</b> | -3.57337                  | <b>28.44</b> | -5.32926                  | <b>51.92</b> |  |
| 45.0     | -0.29328                  | <b>2.16</b> | -0.74173                  | <b>5.56</b> | -1.74738                  | <b>13.65</b> | -3.48973                  | <b>30.11</b> | -5.08961                  | <b>54.08</b> |  |
| 47.5     | -0.29281                  | <b>2.32</b> | -0.73877                  | <b>5.94</b> | -1.72978                  | <b>14.52</b> | -3.40895                  | <b>31.73</b> | -4.86649                  | <b>56.09</b> |  |
| 50.0     | -0.29235                  | <b>2.47</b> | -0.73577                  | <b>6.32</b> | -1.71243                  | <b>15.38</b> | -3.33094                  | <b>33.29</b> | -4.65846                  | <b>57.97</b> |  |
| 52.5     | -0.29191                  | <b>2.62</b> | -0.73282                  | <b>6.70</b> | -1.69539                  | <b>16.22</b> | -3.25549                  | <b>34.80</b> | -4.46429                  | <b>59.72</b> |  |
| 55.0     | -0.29146                  | <b>2.77</b> | -0.72990                  | <b>7.07</b> | -1.67852                  | <b>17.05</b> | -3.18269                  | <b>36.26</b> | -4.28272                  | <b>61.36</b> |  |
| 57.5     | -0.29101                  | <b>2.92</b> | -0.72699                  | <b>7.44</b> | -1.66190                  | <b>17.87</b> | -3.11224                  | <b>37.67</b> | -4.11275                  | <b>62.89</b> |  |
| 60.0     | -0.29057                  | <b>3.07</b> | -0.72409                  | <b>7.81</b> | -1.64553                  | <b>18.68</b> | -3.04408                  | <b>39.04</b> | -3.95335                  | <b>64.33</b> |  |
| 62.5     | -0.29010                  | <b>3.22</b> | -0.72123                  | <b>8.17</b> | -1.62940                  | <b>19.48</b> | -2.97817                  | <b>40.36</b> | -3.80377                  | <b>65.68</b> |  |
| 65.0     | -0.28967                  | <b>3.37</b> | -0.71837                  | <b>8.54</b> | -1.61351                  | <b>20.26</b> | -2.91439                  | <b>41.63</b> | -3.66312                  | <b>66.95</b> |  |
| 67.5     | -0.28921                  | <b>3.52</b> | -0.71549                  | <b>8.90</b> | -1.59781                  | <b>21.04</b> | -2.85261                  | <b>42.87</b> | -3.53078                  | <b>68.15</b> |  |
| 70.0     | -0.28874                  | <b>3.68</b> | -0.71264                  | <b>9.27</b> | -1.58234                  | <b>21.80</b> | -2.79284                  | <b>44.07</b> | -3.40609                  | <b>69.27</b> |  |

Table S2: Percentage difference in current density with respect to the total electroactive surface area ( $j$ ) compared to surface coverage for arrays of spherical particles.

| Coverage | 900mV    |                          | 850mV    |                          | 800mV    |                          | 750mV    |                          | 700mV    |                          |
|----------|----------|--------------------------|----------|--------------------------|----------|--------------------------|----------|--------------------------|----------|--------------------------|
|          | %        | $j$ (A m <sup>-2</sup> ) | % dif.   | $j$ (A m <sup>-2</sup> ) | % dif.   | $j$ (A m <sup>-2</sup> ) | % dif.   | $j$ (A m <sup>-2</sup> ) | % dif.   | $j$ (A m <sup>-2</sup> ) |
| 10.0     | -0.29791 | <b>0.00</b>              | -0.77273 | <b>0.00</b>              | -1.93964 | <b>0.00</b>              | -4.48506 | <b>0.00</b>              | -8.60215 | <b>0.00</b>              |
| 12.5     | -0.29699 | <b>0.31</b>              | -0.76647 | <b>0.81</b>              | -1.89928 | <b>2.08</b>              | -4.25739 | <b>5.08</b>              | -7.65686 | <b>10.99</b>             |
| 15.0     | -0.29607 | <b>0.62</b>              | -0.76027 | <b>1.61</b>              | -1.86011 | <b>4.10</b>              | -4.04613 | <b>9.79</b>              | -6.86033 | <b>20.25</b>             |
| 17.5     | -0.29515 | <b>0.92</b>              | -0.75415 | <b>2.40</b>              | -1.82209 | <b>6.06</b>              | -3.84988 | <b>14.16</b>             | -6.18399 | <b>28.11</b>             |
| 20.0     | -0.29425 | <b>1.23</b>              | -0.74809 | <b>3.19</b>              | -1.78518 | <b>7.96</b>              | -3.66730 | <b>18.23</b>             | -5.60550 | <b>34.84</b>             |
| 22.5     | -0.29334 | <b>1.53</b>              | -0.74211 | <b>3.96</b>              | -1.74933 | <b>9.81</b>              | -3.49723 | <b>22.02</b>             | -5.10736 | <b>40.63</b>             |
| 25.0     | -0.29243 | <b>1.84</b>              | -0.73619 | <b>4.73</b>              | -1.71449 | <b>11.61</b>             | -3.33861 | <b>25.56</b>             | -4.67563 | <b>45.65</b>             |
| 27.5     | -0.29154 | <b>2.14</b>              | -0.73034 | <b>5.49</b>              | -1.68067 | <b>13.35</b>             | -3.19050 | <b>28.86</b>             | -4.29926 | <b>50.02</b>             |
| 30.0     | -0.29064 | <b>2.44</b>              | -0.72456 | <b>6.23</b>              | -1.64780 | <b>15.05</b>             | -3.05201 | <b>31.95</b>             | -3.96926 | <b>53.86</b>             |
| 32.5     | -0.28975 | <b>2.74</b>              | -0.71884 | <b>6.97</b>              | -1.61585 | <b>16.69</b>             | -2.92237 | <b>34.84</b>             | -3.67839 | <b>57.24</b>             |
| 35.0     | -0.28886 | <b>3.04</b>              | -0.71317 | <b>7.71</b>              | -1.58478 | <b>18.29</b>             | -2.80089 | <b>37.55</b>             | -3.42075 | <b>60.23</b>             |
| 37.5     | -0.28797 | <b>3.34</b>              | -0.70758 | <b>8.43</b>              | -1.55459 | <b>19.85</b>             | -2.68692 | <b>40.09</b>             | -3.19148 | <b>62.90</b>             |
| 40.0     | -0.28709 | <b>3.63</b>              | -0.70205 | <b>9.15</b>              | -1.52522 | <b>21.37</b>             | -2.57986 | <b>42.48</b>             | -2.98654 | <b>65.28</b>             |
| 42.2     | -0.28622 | <b>3.92</b>              | -0.69657 | <b>9.86</b>              | -1.49665 | <b>22.84</b>             | -2.47922 | <b>44.72</b>             | -2.80261 | <b>67.42</b>             |
| 45.0     | -0.28534 | <b>4.22</b>              | -0.69115 | <b>10.56</b>             | -1.46886 | <b>24.27</b>             | -2.38448 | <b>46.84</b>             | -2.63687 | <b>69.35</b>             |
| 47.5     | -0.28447 | <b>4.51</b>              | -0.68580 | <b>11.25</b>             | -1.44181 | <b>25.67</b>             | -2.29523 | <b>48.83</b>             | -2.48698 | <b>71.09</b>             |
| 50.0     | -0.28361 | <b>4.80</b>              | -0.68051 | <b>11.93</b>             | -1.41549 | <b>27.02</b>             | -2.21106 | <b>50.70</b>             | -2.35097 | <b>72.67</b>             |
| 52.5     | -0.28274 | <b>5.09</b>              | -0.67526 | <b>12.61</b>             | -1.38986 | <b>28.34</b>             | -2.13159 | <b>52.47</b>             | -2.22713 | <b>74.11</b>             |
| 55.0     | -0.28188 | <b>5.38</b>              | -0.67008 | <b>13.28</b>             | -1.36491 | <b>29.63</b>             | -2.05651 | <b>54.15</b>             | -2.11405 | <b>75.42</b>             |
| 57.5     | -0.28102 | <b>5.67</b>              | -0.66494 | <b>13.95</b>             | -1.34060 | <b>30.88</b>             | -1.98548 | <b>55.73</b>             | -2.01045 | <b>76.63</b>             |
| 60.0     | -0.28017 | <b>5.96</b>              | -0.65987 | <b>14.61</b>             | -1.31693 | <b>32.10</b>             | -1.91827 | <b>57.23</b>             | -1.91532 | <b>77.73</b>             |
| 62.5     | -0.27932 | <b>6.24</b>              | -0.65484 | <b>15.26</b>             | -1.29387 | <b>33.29</b>             | -1.85458 | <b>58.65</b>             | -1.82772 | <b>78.75</b>             |
| 65.0     | -0.27847 | <b>6.53</b>              | -0.64987 | <b>15.90</b>             | -1.27140 | <b>34.45</b>             | -1.79418 | <b>60.00</b>             | -1.74685 | <b>79.69</b>             |
| 67.5     | -0.27763 | <b>6.81</b>              | -0.64495 | <b>16.54</b>             | -1.24950 | <b>35.58</b>             | -1.73687 | <b>61.27</b>             | -1.67203 | <b>80.56</b>             |
| 70.0     | -0.27677 | <b>7.09</b>              | -0.64006 | <b>17.17</b>             | -1.22813 | <b>36.68</b>             | -1.68241 | <b>62.49</b>             | -1.60263 | <b>81.37</b>             |

Table S3: Percentage difference in current density with respect to the total electroactive surface area ( $j$ ) compared to surface coverage for arrays of semicircular nanowires.

| Coverage |                           | 900mV       |                           | 850mV       |                           | 800mV        |                           | 750mV        |                           | 700mV        |  |
|----------|---------------------------|-------------|---------------------------|-------------|---------------------------|--------------|---------------------------|--------------|---------------------------|--------------|--|
| %        | $j$ ( $\text{A m}^{-2}$ ) | % dif.      | $j$ ( $\text{A m}^{-2}$ ) | % dif.      | $j$ ( $\text{A m}^{-2}$ ) | % dif.       | $j$ ( $\text{A m}^{-2}$ ) | % dif.       | $j$ ( $\text{A m}^{-2}$ ) | % dif.       |  |
| 10.0     | -0.15024                  | <b>0.00</b> | -0.39456                  | <b>0.00</b> | -1.02252                  | <b>0.00</b>  | -2.56108                  | <b>0.00</b>  | -5.89079                  | <b>0.00</b>  |  |
| 12.5     | -0.15006                  | <b>0.12</b> | -0.39328                  | <b>0.32</b> | -1.01392                  | <b>0.84</b>  | -2.50575                  | <b>2.16</b>  | -5.58139                  | <b>5.25</b>  |  |
| 15.0     | -0.14988                  | <b>0.24</b> | -0.39202                  | <b>0.64</b> | -1.00541                  | <b>1.67</b>  | -2.45208                  | <b>4.26</b>  | -5.29504                  | <b>10.11</b> |  |
| 17.5     | -0.14969                  | <b>0.36</b> | -0.39076                  | <b>0.96</b> | -0.99699                  | <b>2.50</b>  | -2.40003                  | <b>6.29</b>  | -5.02961                  | <b>14.62</b> |  |
| 20.0     | -0.14951                  | <b>0.49</b> | -0.38952                  | <b>1.28</b> | -0.98865                  | <b>3.31</b>  | -2.34955                  | <b>8.26</b>  | -4.78329                  | <b>18.80</b> |  |
| 22.5     | -0.14933                  | <b>0.60</b> | -0.38825                  | <b>1.60</b> | -0.98041                  | <b>4.12</b>  | -2.30058                  | <b>10.17</b> | -4.55434                  | <b>22.69</b> |  |
| 25.0     | -0.14915                  | <b>0.72</b> | -0.38702                  | <b>1.91</b> | -0.97229                  | <b>4.91</b>  | -2.25305                  | <b>12.03</b> | -4.34127                  | <b>26.30</b> |  |
| 27.5     | -0.14897                  | <b>0.84</b> | -0.38577                  | <b>2.23</b> | -0.96424                  | <b>5.70</b>  | -2.20691                  | <b>13.83</b> | -4.14272                  | <b>29.67</b> |  |
| 30.0     | -0.14878                  | <b>0.97</b> | -0.38453                  | <b>2.54</b> | -0.95630                  | <b>6.48</b>  | -2.16215                  | <b>15.58</b> | -3.95749                  | <b>32.82</b> |  |
| 32.5     | -0.14861                  | <b>1.08</b> | -0.38331                  | <b>2.85</b> | -0.94843                  | <b>7.25</b>  | -2.11867                  | <b>17.27</b> | -3.78443                  | <b>35.76</b> |  |
| 35.0     | -0.14843                  | <b>1.20</b> | -0.38209                  | <b>3.16</b> | -0.94066                  | <b>8.01</b>  | -2.07645                  | <b>18.92</b> | -3.62254                  | <b>38.51</b> |  |
| 37.5     | -0.14824                  | <b>1.33</b> | -0.38085                  | <b>3.47</b> | -0.93301                  | <b>8.75</b>  | -2.03545                  | <b>20.52</b> | -3.47097                  | <b>41.08</b> |  |
| 40.0     | -0.14807                  | <b>1.44</b> | -0.37966                  | <b>3.78</b> | -0.92541                  | <b>9.50</b>  | -1.99559                  | <b>22.08</b> | -3.32881                  | <b>43.49</b> |  |
| 42.2     | -0.14788                  | <b>1.57</b> | -0.37843                  | <b>4.09</b> | -0.91791                  | <b>10.23</b> | -1.95686                  | <b>23.59</b> | -3.19540                  | <b>45.76</b> |  |
| 45.0     | -0.14771                  | <b>1.68</b> | -0.37723                  | <b>4.39</b> | -0.91047                  | <b>10.96</b> | -1.91925                  | <b>25.06</b> | -3.07003                  | <b>47.88</b> |  |
| 47.5     | -0.14752                  | <b>1.81</b> | -0.37605                  | <b>4.69</b> | -0.90316                  | <b>11.67</b> | -1.88265                  | <b>26.49</b> | -2.95211                  | <b>49.89</b> |  |
| 50.0     | -0.14733                  | <b>1.93</b> | -0.37485                  | <b>5.00</b> | -0.89590                  | <b>12.38</b> | -1.84709                  | <b>27.88</b> | -2.84105                  | <b>51.77</b> |  |
| 52.5     | -0.14715                  | <b>2.05</b> | -0.37367                  | <b>5.29</b> | -0.88875                  | <b>13.08</b> | -1.81249                  | <b>29.23</b> | -2.73635                  | <b>53.55</b> |  |
| 55.0     | -0.14699                  | <b>2.16</b> | -0.37249                  | <b>5.59</b> | -0.88165                  | <b>13.78</b> | -1.77884                  | <b>30.54</b> | -2.63757                  | <b>55.23</b> |  |
| 57.5     | -0.14680                  | <b>2.29</b> | -0.37130                  | <b>5.89</b> | -0.87465                  | <b>14.46</b> | -1.74609                  | <b>31.82</b> | -2.54424                  | <b>56.81</b> |  |
| 60.0     | -0.14663                  | <b>2.40</b> | -0.37013                  | <b>6.19</b> | -0.86775                  | <b>15.14</b> | -1.71424                  | <b>33.07</b> | -2.45603                  | <b>58.31</b> |  |
| 62.5     | -0.14644                  | <b>2.52</b> | -0.36895                  | <b>6.49</b> | -0.86086                  | <b>15.81</b> | -1.68322                  | <b>34.28</b> | -2.37253                  | <b>59.72</b> |  |
| 65.0     | -0.14626                  | <b>2.65</b> | -0.36779                  | <b>6.78</b> | -0.85411                  | <b>16.47</b> | -1.65302                  | <b>35.46</b> | -2.29344                  | <b>61.07</b> |  |
| 67.5     | -0.14610                  | <b>2.76</b> | -0.36664                  | <b>7.07</b> | -0.84739                  | <b>17.13</b> | -1.62366                  | <b>36.60</b> | -2.21851                  | <b>62.34</b> |  |
| 70.0     | -0.14591                  | <b>2.88</b> | -0.36548                  | <b>7.37</b> | -0.84078                  | <b>17.77</b> | -1.59499                  | <b>37.72</b> | -2.14733                  | <b>63.55</b> |  |

Table S4: Percentage difference in current density with respect to the total electroactive surface area ( $j$ ) compared to surface coverage for arrays of cylinders.

| Coverage | 900mV    |                          | 850mV    |                          | 800mV    |                          | 750mV    |                          | 700mV    |                          |
|----------|----------|--------------------------|----------|--------------------------|----------|--------------------------|----------|--------------------------|----------|--------------------------|
|          | %        | $j$ (A m <sup>-2</sup> ) | % dif.   | $j$ (A m <sup>-2</sup> ) | % dif.   | $j$ (A m <sup>-2</sup> ) | % dif.   | $j$ (A m <sup>-2</sup> ) | % dif.   | $j$ (A m <sup>-2</sup> ) |
| 10.0     | -0.30082 | <b>0.00</b>              | -0.78828 | <b>0.00</b>              | -2.03137 | <b>0.00</b>              | -5.01443 | <b>0.00</b>              | #####    | <b>0.00</b>              |
| 12.5     | -0.30054 | <b>0.09</b>              | -0.78561 | <b>0.34</b>              | -2.01129 | <b>0.99</b>              | -4.88280 | <b>2.63</b>              | #####    | <b>6.36</b>              |
| 15.0     | -0.29940 | <b>0.47</b>              | -0.78037 | <b>1.00</b>              | -1.98407 | <b>2.33</b>              | -4.73633 | <b>5.55</b>              | -9.74097 | <b>12.54</b>             |
| 17.5     | -0.29880 | <b>0.67</b>              | -0.77678 | <b>1.46</b>              | -1.96193 | <b>3.42</b>              | -4.60784 | <b>8.11</b>              | -9.14191 | <b>17.92</b>             |
| 20.0     | -0.29923 | <b>0.53</b>              | -0.77627 | <b>1.52</b>              | -1.94877 | <b>4.07</b>              | -4.50653 | <b>10.13</b>             | -8.64275 | <b>22.40</b>             |
| 22.5     | -0.29851 | <b>0.77</b>              | -0.77237 | <b>2.02</b>              | -1.92623 | <b>5.18</b>              | -4.38452 | <b>12.56</b>             | -8.13563 | <b>26.96</b>             |
| 25.0     | -0.29816 | <b>0.88</b>              | -0.76958 | <b>2.37</b>              | -1.90706 | <b>6.12</b>              | -4.27466 | <b>14.75</b>             | -7.68634 | <b>30.99</b>             |
| 27.5     | -0.29764 | <b>1.06</b>              | -0.76627 | <b>2.79</b>              | -1.88669 | <b>7.12</b>              | -4.16517 | <b>16.94</b>             | -7.26683 | <b>34.76</b>             |
| 30.0     | -0.29696 | <b>1.28</b>              | -0.76251 | <b>3.27</b>              | -1.86531 | <b>8.17</b>              | -4.05651 | <b>19.10</b>             | -6.87514 | <b>38.27</b>             |
| 32.5     | -0.29691 | <b>1.30</b>              | -0.76063 | <b>3.51</b>              | -1.84938 | <b>8.96</b>              | -3.96408 | <b>20.95</b>             | -6.53668 | <b>41.31</b>             |
| 35.0     | -0.29615 | <b>1.55</b>              | -0.75666 | <b>4.01</b>              | -1.82793 | <b>10.01</b>             | -3.86130 | <b>23.00</b>             | -6.19987 | <b>44.34</b>             |
| 37.5     | -0.29563 | <b>1.73</b>              | -0.75342 | <b>4.42</b>              | -1.80874 | <b>10.96</b>             | -3.76678 | <b>24.88</b>             | -5.89647 | <b>47.06</b>             |
| 40.0     | -0.29529 | <b>1.84</b>              | -0.75074 | <b>4.76</b>              | -1.79125 | <b>11.82</b>             | -3.67881 | <b>26.64</b>             | -5.62090 | <b>49.53</b>             |
| 42.2     | -0.29475 | <b>2.02</b>              | -0.74748 | <b>5.18</b>              | -1.77244 | <b>12.75</b>             | -3.59037 | <b>28.40</b>             | -5.35934 | <b>51.88</b>             |
| 45.0     | -0.29420 | <b>2.20</b>              | -0.74418 | <b>5.59</b>              | -1.75374 | <b>13.67</b>             | -3.50457 | <b>30.11</b>             | -5.11552 | <b>54.07</b>             |
| 47.5     | -0.29410 | <b>2.23</b>              | -0.74223 | <b>5.84</b>              | -1.73882 | <b>14.40</b>             | -3.42950 | <b>31.61</b>             | -4.90094 | <b>56.00</b>             |
| 50.0     | -0.29347 | <b>2.44</b>              | -0.73873 | <b>6.29</b>              | -1.72002 | <b>15.33</b>             | -3.34800 | <b>33.23</b>             | -4.68693 | <b>57.92</b>             |
| 52.5     | -0.29298 | <b>2.61</b>              | -0.73567 | <b>6.67</b>              | -1.70257 | <b>16.19</b>             | -3.27161 | <b>34.76</b>             | -4.49083 | <b>59.68</b>             |
| 55.0     | -0.29230 | <b>2.83</b>              | -0.73208 | <b>7.13</b>              | -1.68394 | <b>17.10</b>             | -3.19472 | <b>36.29</b>             | -4.30285 | <b>61.37</b>             |
| 57.5     | -0.29250 | <b>2.77</b>              | -0.73103 | <b>7.26</b>              | -1.67208 | <b>17.69</b>             | -3.13404 | <b>37.50</b>             | -4.14691 | <b>62.77</b>             |
| 60.0     | -0.29186 | <b>2.98</b>              | -0.72755 | <b>7.70</b>              | -1.65413 | <b>18.57</b>             | -3.06230 | <b>38.93</b>             | -3.98192 | <b>64.25</b>             |
| 62.5     | -0.29127 | <b>3.17</b>              | -0.72426 | <b>8.12</b>              | -1.63686 | <b>19.42</b>             | -2.99383 | <b>40.30</b>             | -3.82841 | <b>65.63</b>             |
| 65.0     | -0.29034 | <b>3.48</b>              | -0.71999 | <b>8.66</b>              | -1.61728 | <b>20.39</b>             | -2.92235 | <b>41.72</b>             | -3.67688 | <b>66.99</b>             |
| 67.5     | -0.28991 | <b>3.63</b>              | -0.71717 | <b>9.02</b>              | -1.60156 | <b>21.16</b>             | -2.86041 | <b>42.96</b>             | -3.54424 | <b>68.18</b>             |
| 70.0     | -0.29003 | <b>3.59</b>              | -0.71592 | <b>9.18</b>              | -1.59000 | <b>21.73</b>             | -2.80817 | <b>44.00</b>             | -3.42985 | <b>69.21</b>             |

Table S5: Percentage difference in current density with respect to the total electroactive surface area ( $j$ ) compared to cylinder radius for arrays of cylinders 5 nm high with a 40% coverage.

| Coverage |                           | 900mV       |                           | 850mV       |                           | 800mV        |                           | 750mV        |                           | 700mV        |  |
|----------|---------------------------|-------------|---------------------------|-------------|---------------------------|--------------|---------------------------|--------------|---------------------------|--------------|--|
| %        | $j$ ( $\text{A m}^{-2}$ ) | % dif.      | $j$ ( $\text{A m}^{-2}$ ) | % dif.      | $j$ ( $\text{A m}^{-2}$ ) | % dif.       | $j$ ( $\text{A m}^{-2}$ ) | % dif.       | $j$ ( $\text{A m}^{-2}$ ) | % dif.       |  |
| 100      | -0.29840                  | <b>0.00</b> | -0.77242                  | <b>0.00</b> | -1.92875                  | <b>0.00</b>  | -4.40386                  | <b>0.00</b>  | -8.22348                  | <b>0.00</b>  |  |
| 50       | -0.29804                  | <b>0.12</b> | -0.76993                  | <b>0.32</b> | -1.91266                  | <b>0.83</b>  | -4.31338                  | <b>2.05</b>  | -7.85174                  | <b>4.52</b>  |  |
| 20       | -0.29698                  | <b>0.48</b> | -0.76257                  | <b>1.27</b> | -1.86559                  | <b>3.27</b>  | -4.05740                  | <b>7.87</b>  | -6.87642                  | <b>16.38</b> |  |
| 10       | -0.29529                  | <b>1.04</b> | -0.75074                  | <b>2.81</b> | -1.79125                  | <b>7.13</b>  | -3.67881                  | <b>16.46</b> | -5.62090                  | <b>31.65</b> |  |
| 5        | -0.29227                  | <b>2.05</b> | -0.72874                  | <b>5.66</b> | -1.65724                  | <b>14.08</b> | -3.06912                  | <b>30.31</b> | -3.99252                  | <b>51.45</b> |  |

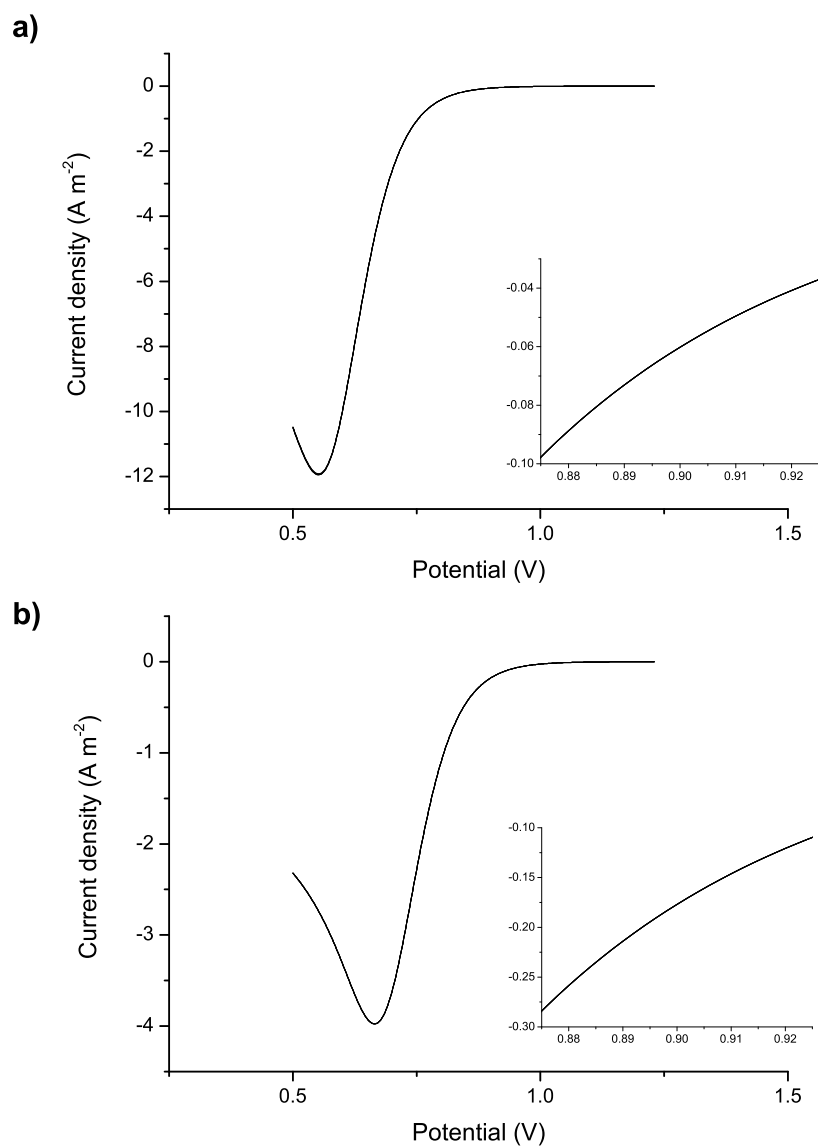

Figure S1: Simulated voltammograms for hemispherical nanoparticle modified electrodes, of varying sizes (5, 10, 20, 50, 100 nm in radius) in terms of current density with respect to the total electroactive surface area for fixed coverages of a) 20% and b) 60%. The inset for each graph shows the region around 900mV.

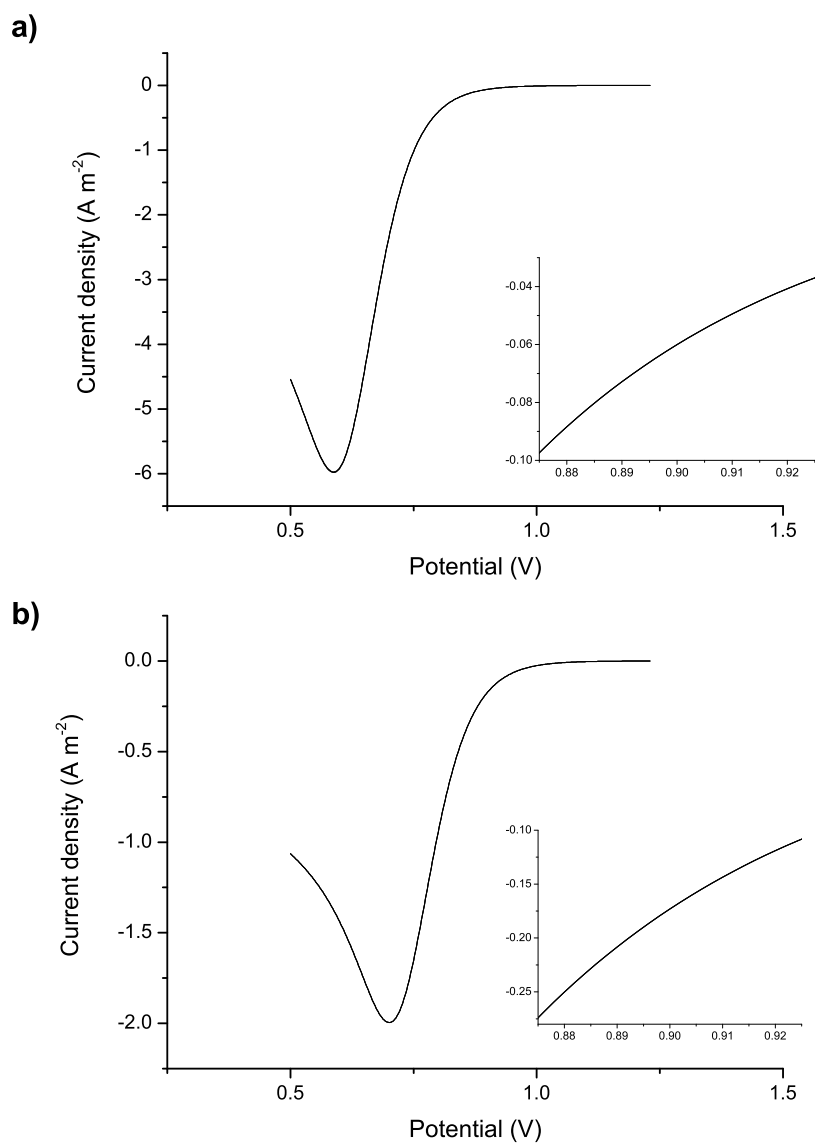

Figure S2: Simulated voltammograms for spherical nanoparticle modified electrodes, of varying sizes (20, 50, 100 nm in radius) in terms of current density with respect to the total electroactive surface area for fixed coverages of a) 20% and b)60%. The inset for each graph shows the region around 900mV.

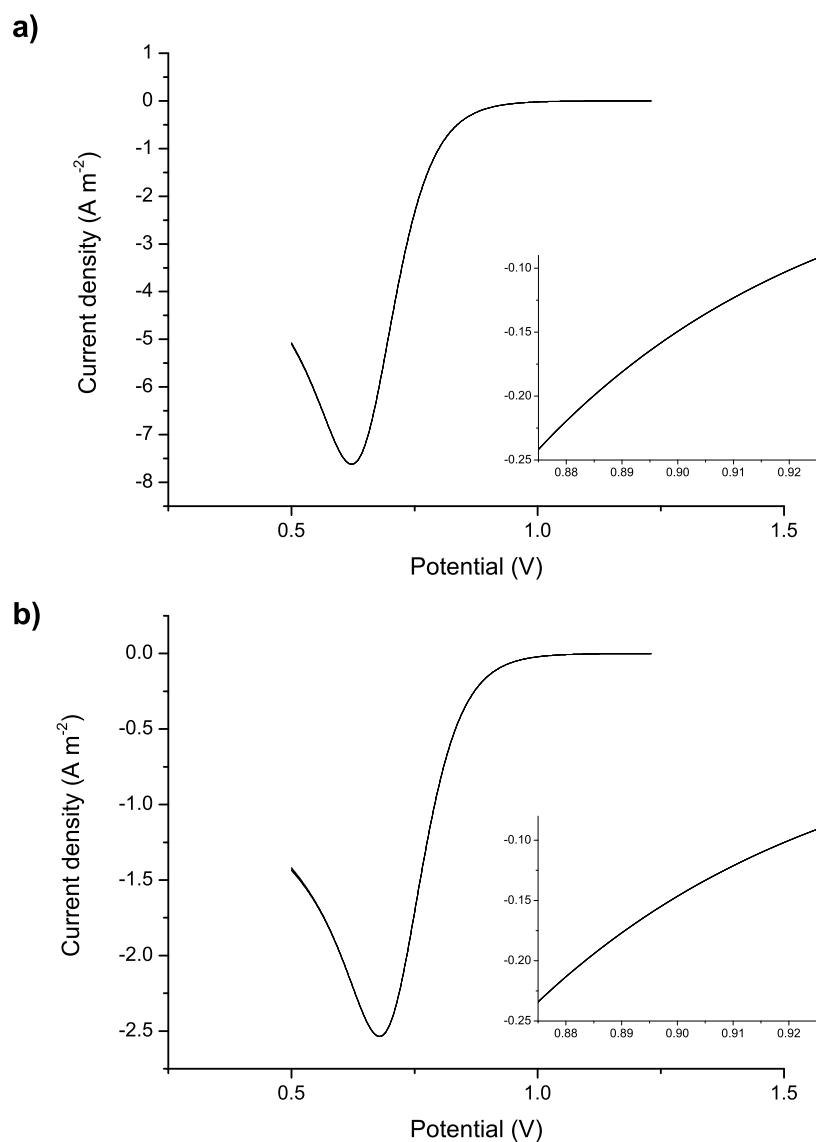

Figure S3: Simulated voltammograms for semicircular nanowire modified electrodes, of varying sizes (5, 10, 20, 50, 100 nm in radius) in terms of current density with respect to the total electroactive surface area for fixed coverages of a) 20% and b)60%. The inset for each graph shows the region around 900mV.
